# Supplementary material for: N 6-Methyladenosines in mRNAs reduce the accuracy of codon reading by transfer RNAs and peptide release factors
Source: PubMed Central journal article supplement — Nucleic Acids Res. 2021 Feb 9;49(5):2684–99. doi: 10.1093/nar/gkab033 (PMC7969026; doi:10.1093/nar/gkab033), 2021-02-09
Supplement: gkab033_supplemental_file.pdf [file gkab033_supplemental_file.pdf]

## Supplementary materials for

# *N*<sup>6</sup>-methyladenosines in mRNAs reduce the accuracy of codon reading by transfer RNAs and peptide release factors

Ka-Weng Jeong<sup>1,#</sup>, Gabriele Indrisiunaite<sup>1,2,#</sup>, Arjun Prabhakar<sup>3,4</sup>, Joseph D. Puglisi<sup>3</sup> and Måns Ehrenberg<sup>1\*</sup>

<sup>1</sup>Department of Cell and Molecular Biology, Biomedical Center, Box 596, Uppsala University, Uppsala, Sweden

<sup>2</sup>Current address: Department of Biology, University of Copenhagen, Ole Maaløes Vej 5, DK-2200 Copenhagen N, Denmark.

<sup>3</sup>Department of Structural Biology, Stanford University School of Medicine, Stanford, CA 94305-5126, USA.

<sup>4</sup>Current address: Pacific Biosciences, Inc., Menlo Park, CA 94025, USA.

#These authors contributed equally to the work

\*Corresponding Author: mans.ehrenberg@icm.uu.se

## Supplementary Figures

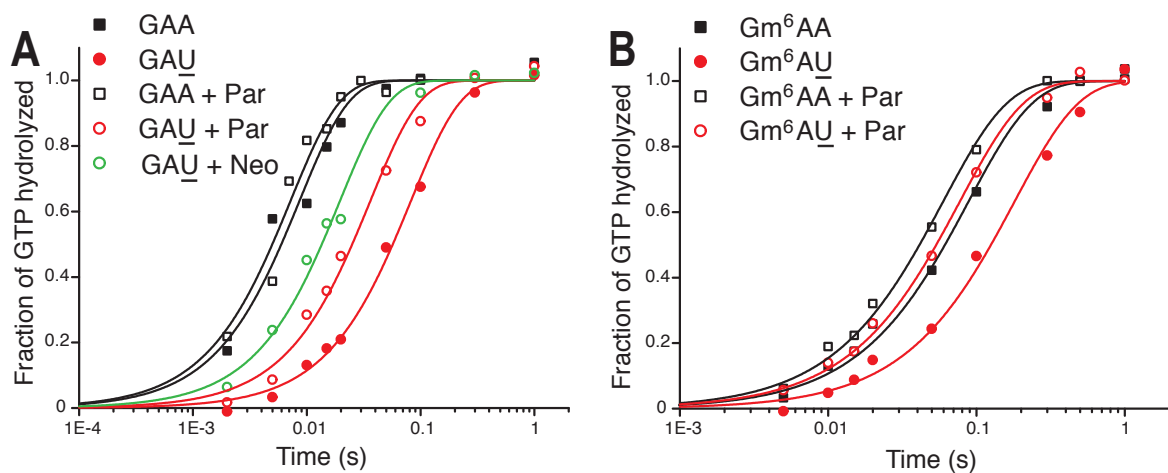

**Figure S1. *m*<sup>6</sup>A modifications and the impact of aminoglycoside addition on the efficiency of codon reading by *T*<sub>3</sub> at high [Mg<sup>2+</sup>] concentration.** The experiments were carried out as described in Figure 2 of main text with ribosomes (0.6 μM) in excess over ternary complex (*T*<sub>3</sub>). Fractions of GTPs hydrolyzed on Glu-tRNA<sup>Glu</sup>-containing *T*<sub>3</sub> (*y*-axis) at different reaction times (*x*-axis, log<sub>10</sub> display) for *T*<sub>3</sub> reading unmodified codons at 25 mM (A) and modified codons at 16 mM (B) free [Mg<sup>2+</sup>]. Cognate GAA (A) or Gm<sup>6</sup>AA (B) closed black squares in the absence and open black squares in the presence of Par. Near cognate GAU (A) or Gm<sup>6</sup>AU (B) filled red circles in the absence and open red circles in the presence of Par. Near cognate GAU open green circles in the presence of Neo (A).

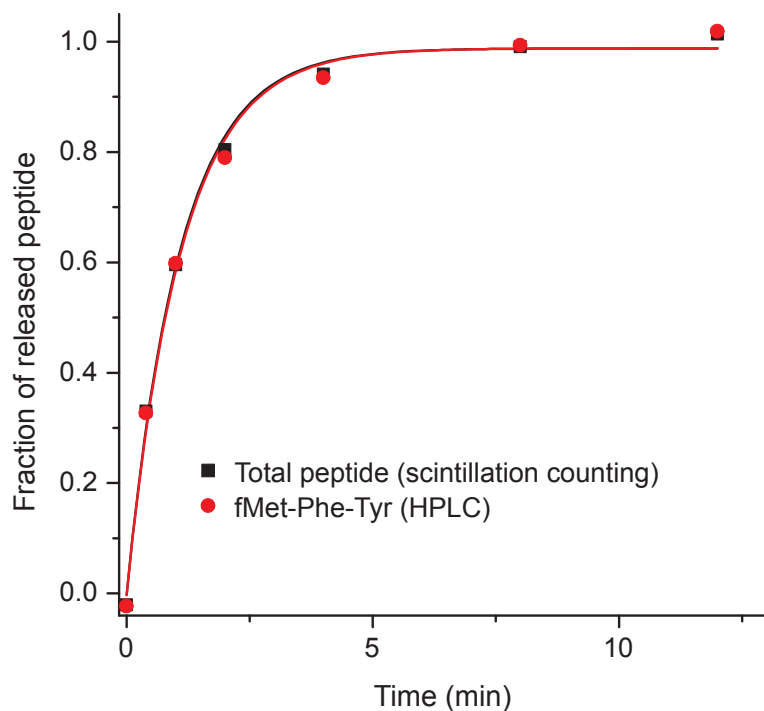

**Figure S2. A comparison of peptide release measured by scintillation counting (total peptide) and HPLC (only fMFY).** 0.3  $\mu\text{M}$  ribosomal termination complexes containing  $^3\text{H}$ -labelled fMet-Phe-Tyr-tRNA<sup>Tyr</sup> in the P site and UAG codon in the A site were reacted to 3.3  $\mu\text{M}$  RF2 in polymix buffer with 2.5 mM free  $\text{Mg}^{2+}$  at 37  $^{\circ}\text{C}$ . The  $k_{rel}$  measured by HPLC and by scintillation counting was the same ( $0.9 \pm 0.06$  /min and  $0.9 \pm 0.04$  /min respectively).

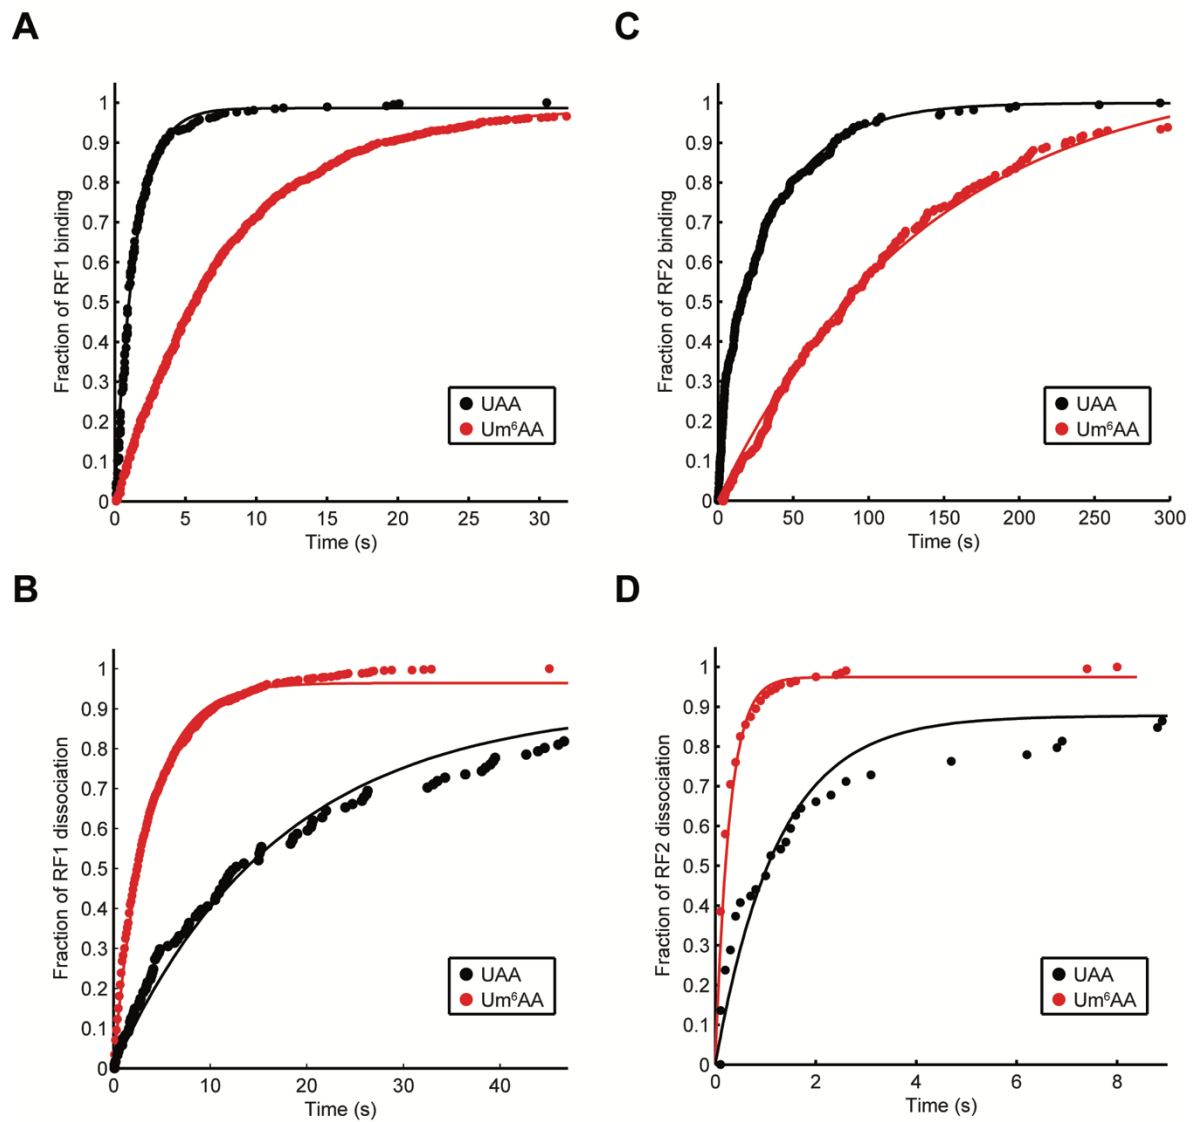

**Figure S3. Measurements of RF1 and RF2 association and dissociation kinetics on UAA and Um<sup>6</sup>AA codons from single-molecule assay.** (A) Time-course of RF1 arrival on UAA and Um<sup>6</sup>AA codons fit to single exponential functions. (B) Time-course of RF1 dissociation from UAA and Um<sup>6</sup>AA codons fit to single exponential functions. (C) Time-course of RF2 arrival on UAA and Um<sup>6</sup>AA codons fit to single (Um<sup>6</sup>AA) and double (UAA) exponential functions. (D) Time-course of RF2 dissociation from UAA and Um<sup>6</sup>AA codons fit to single exponential functions. All time-course plots are cumulative distribution functions generated from measured RF arrival and RF occupancy times (see Figure 8C-D).

## Supplementary Tables

**Table S1. Accuracy parameters for tRNA<sup>Glu</sup> selection on modified and unmodified codons with and without the aminoglycoside paromomycin. Measurements were conducted in polymix buffer with 2.3 mM free Mg<sup>2+</sup>. Related to Figure 3.**

| Codon pairs                           | Paromomycin      | $k_a$ ( $\mu\text{M}^{-1}\text{s}^{-1}$ ) | $d_e$ value   | Initial selection | Proofreading | Total accuracy   |
|---------------------------------------|------------------|-------------------------------------------|---------------|-------------------|--------------|------------------|
| GAA/GAU                               | No               | $239 \pm 10$                              | $80 \pm 4$    | $60 \pm 10$       | $290 \pm 40$ | $17500 \pm 2600$ |
| GAA/GAU                               | 10 $\mu\text{M}$ | $260 \pm 15$                              | $11 \pm 1$    |                   |              |                  |
| Gm <sup>6</sup> AA/Gm <sup>6</sup> AU | No               | $20 \pm 9$                                | $20 \pm 13$   | $15 \pm 1.6$      | $92 \pm 8$   | $1360 \pm 170$   |
| Gm <sup>6</sup> AA/Gm <sup>6</sup> AU | 10 $\mu\text{M}$ | $22 \pm 9$                                | $2.8 \pm 1.2$ |                   |              |                  |

**Table S2. Kinetic parameters for tRNA<sup>Glu</sup> reading its cognate codons. Measurements were conducted in polymix buffer with 2.3 mM free Mg<sup>2+</sup>. Related to Figure 4A,B.**

| Codon              | $k_{\text{GTP}}$ ( $\text{s}^{-1}$ ) | Rib ( $\mu\text{M}$ ) | $k_{\text{cat}}/K_m$ (GTP) ( $\mu\text{M}^{-1}\text{s}^{-1}$ ) | $k_{\text{dip}}$ ( $\text{s}^{-1}$ ) | $k_{\text{pep}}$ ( $\text{s}^{-1}$ ) | Yield of dipeptide ( $\mu\text{M}$ ) |
|--------------------|--------------------------------------|-----------------------|----------------------------------------------------------------|--------------------------------------|--------------------------------------|--------------------------------------|
| GAA                | $120 \pm 15$                         | 2                     | $59 \pm 7$                                                     | $50 \pm 5$                           | $86 \pm 18$                          | 0.65                                 |
| Gm <sup>6</sup> AA | $12 \pm 0.6$                         | 2                     | $5.9 \pm 0.3$                                                  | $10 \pm 0.3$                         | $58 \pm 30$                          | 0.63                                 |

**Table S3. Kinetic parameters for dipeptide formation from tRNA<sup>Glu</sup> misreading GAU and Gm<sup>6</sup>AU. Related to Figure 4C, D. T<sub>3</sub> - ternary complex EF-Tu·Glu-tRNA<sup>Glu</sup>·GTP.**

| Codon              | T <sub>3</sub> ( $\mu\text{M}$ ) | $k_{\text{dip}}$ ( $\text{ms}^{-1}$ ) | $k_{\text{cat}}/K_m$ ( $\text{mM}^{-1}\text{s}^{-1}$ ) | Average $k_{\text{cat}}/K_m$ ( $\text{mM}^{-1}\text{s}^{-1}$ ) |
|--------------------|----------------------------------|---------------------------------------|--------------------------------------------------------|----------------------------------------------------------------|
| GAU                | 0.7                              | $2.2 \pm 0.3$                         | $3.2 \pm 0.4$                                          | $3.4 \pm 0.3$                                                  |
| GAU                | 1.4                              | $5.0 \pm 0.7$                         | $3.6 \pm 0.5$                                          |                                                                |
| Gm <sup>6</sup> AU | 0.7                              | $2.7 \pm 0.3$                         | $3.9 \pm 0.4$                                          | $4.1 \pm 0.3$                                                  |
| Gm <sup>6</sup> AU | 1.4                              | $6.1 \pm 0.6$                         | $4.4 \pm 0.4$                                          |                                                                |

**Table S4. Kinetic parameters for measurement of apparent dissociation constant for tRNA<sup>Glu</sup> reading its cognate codons.**

| <b>Codon</b>       | $A_{slow}/A_{fast}$ | $k_{slow}$ (s <sup>-1</sup> ) | $k_{dis}$ (s <sup>-1</sup> ) |
|--------------------|---------------------|-------------------------------|------------------------------|
| GAA                | 1.1                 | 1.1 ± 0.2                     | 2.4 ± 0.3                    |
| Gm <sup>6</sup> AA | 0.84                | 0.76 ± 0.17                   | 1.4 ± 0.3                    |
